# Supplementary material
Source: publisher site journal article supplement (https://www.spandidos-publications.com/4042/downloadSupplementary)
Supplement: Supplementary file 1 [file downloadSupplementary]

## Sheet: DS genes
Table SIII. DS genes indicate differences between CSC side- and main Ewing population.
This table is extending Table I by giving more details on the creation of the sets and how stable the sets are.
The two tables below, denoted with [1] and [2], are showing the impact of considering the exon start site or not.
It can be observed that the more stringent approach [1] including the exon start information is discarding some hits compared to the gene name based approach [2].
The decision was to go with the more stringent situation [1].
Description
blue: the analysis is: [1] splice start exon aware --or-- [2] disregarding the splice location (only considering the gene name)
yellow: the genes which are unique per group, green: overlap, white: not in the intersection for the overlap
i: marking an intersection e.g. G1iG2
Only the JC approach
[1] With splice location
				cf. basic set sizes
	BC' i H1	BC' i H2		BC'	H1	H2
gene count	8	6		38	736	1002
	21% BC'	16% BC'
	ATP13A3_194412198	EPB41_29058588
	EPB41_29058588	KMO_241590011
	HLCS_36947332	SNHG1_62851987
	OGT_71536177	SNHG17_38422091
	POC5_75707736	STRADA_63728333
	SNHG17_38422091	TRDMT1_17161482
	TCAIM_44367455
	TRA2A_23521706
				cf. basic set sizes
	NSP' i G1	NSP' i G2		NSP'	G1	G2
gene count	8	9		24	736	1265
	33% NSP'	37% NSP'
	ACADVL_7223812	AC022826.2_73825146
	LMO7_75835151	ACADVL_7223812
	NOP58_202278211	LMO7_75835151
	POLDIP3_42601969	NOP58_202278211
	RMDN1_86472348	SELENBP1_151369003
	SMARCB1_23791755	TM7SF3_27003235
	TM7SF3_27003235	TSPAN3_77055788
	TSPAN3_77055788	ZFAND1_81721226
		ZNF283_43837052
[2] Without splice location
				cf. basic set sizes
	BC' i H1	BC' i H2		BC'	H1	H2
gene count	13	10		37	602	841
	35% BC'	27% BC'
	ATP13A3	CCDC25
	CCDC25	EPB41
	EPB41	EPC1
	HLCS	KMO
	LETMD1	LETMD1
	OGT	LRP8
	POC5	SNHG1
	RIOK3	SNHG17
	SNHG1	STRADA
	SNHG17	TRDMT1
	TBC1D5
	TCAIM
	TRA2A
				cf. basic set sizes
	NSP' i G1	NSP' i G2		NSP'	G1	G2
gene count	10	11		23	606	1019
	43% NSP'	48% NSP'
	ACADVL	AC022826.2
	LMO7	ACADVL
	NOP58	LMO7
	POLDIP3	NOP58
	RMDN1	SELENBP1
	SMARCB1	SPOP
	TBC1D5	TBC1D5
	TM7SF3	TM7SF3
	TSPAN3	TSPAN3
	ZFAND1	ZFAND1
		ZNF283
